# Supplementary material for: Modulating the surface structure of nanodiamonds to enhance the electronic metal–support interaction of efficient ruthenium catalysts for levulinic acid hydrogenation
Source: Royal Society of Chemistry journal article supplement (doi:10.1039/d2nj06229a), 2023-01-01
Supplement: d2nj06229a1.pdf [file d2nj06229a1.pdf]

## Support information

# Modulating the surface structure of nanodiamonds to enhance electronic metal-support interaction for efficient ruthenium catalyst in levulinic acid hydrogenation

Guojun Lan\*, Zhenqing Li, Xiaojia Han, Liping Zhang, Yiyang Qiu, Xiucheng Sun,

Zaizhe Cheng, Ying Li\*

Institute of Industrial Catalysis, Zhejiang University of Technology, Chaowang Road  
18, Hangzhou, China

\*Guojun Lan – Institute of Industrial Catalysis, Zhejiang University of Technology,  
Hangzhou 310032, PR China; Email: languojun@zjut.edu.cn

\*Ying Li – Institute of Industrial Catalysis, Zhejiang University of Technology,  
Hangzhou 310032, PR China; Email: liying@zjut.edu.cn

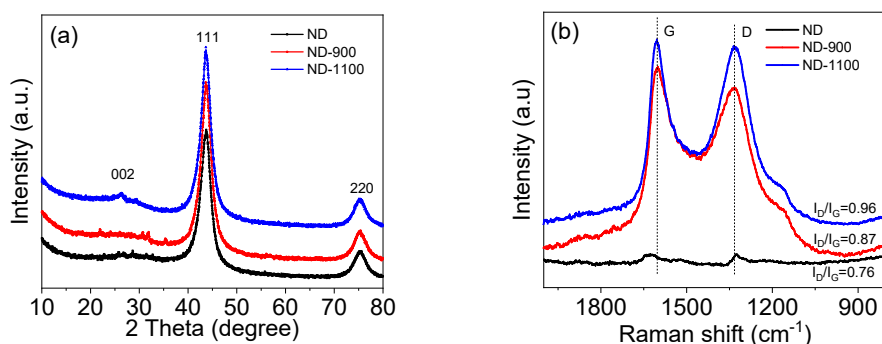

Figure S1 (a) XRD patterns and (b) Raman spectra of ND-T support.

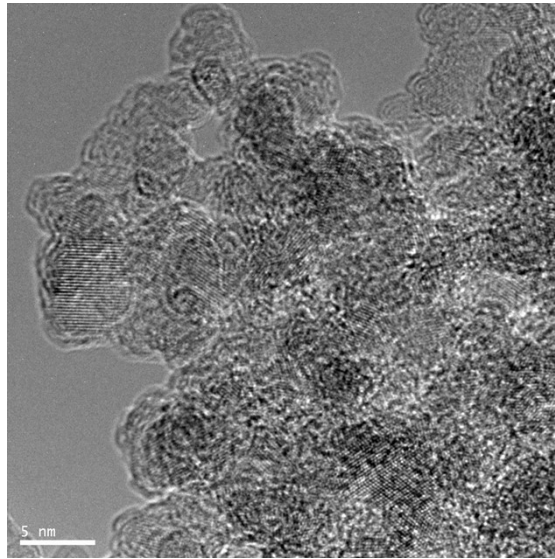

Figure S2 Representative TEM image of ND-900.

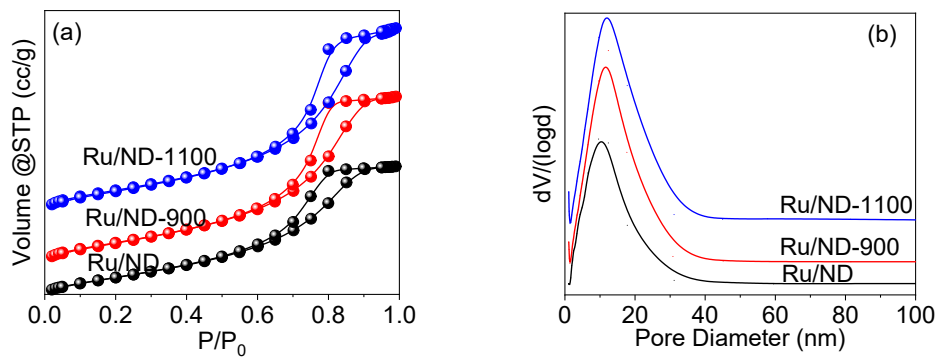

Figure S3 Nitrogen adsorption-desorption isotherms (a) and pore size distribution (b) of the Ru/ND, Ru/ND-900 and Ru/ND-1100.

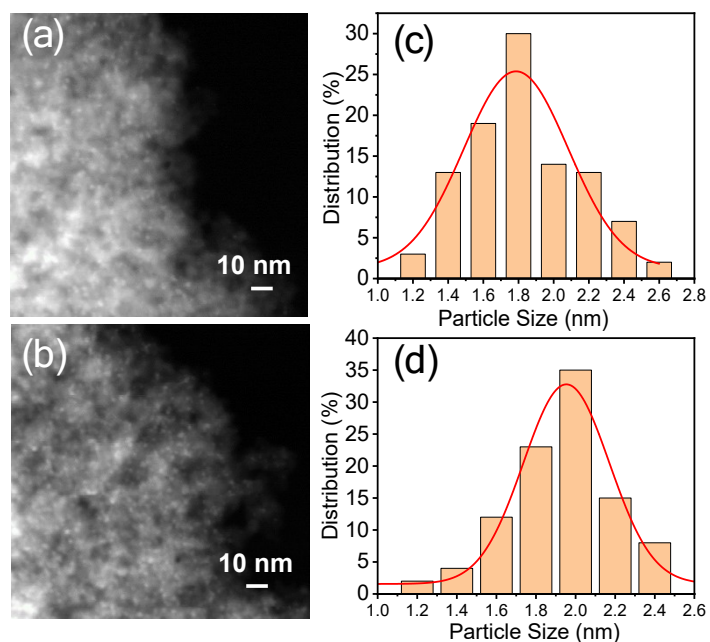

Figure S4 Representative TEM images and corresponding particle size distributions for Ru catalysts (a, c) 1wt%Ru/ND-900 and (b, d) 4wt%Ru/ND-900

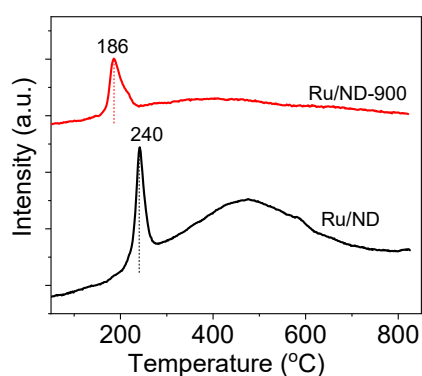

Figure S5 Temperature-programmed reduction curves of the Ru/ND and Ru/ND-900.

Table S1 Texture properties and elemental composition of ND, ND-900 and ND-1100.

| Samples | S. A.<br>(m <sup>2</sup> /g) | P. V. (cm <sup>3</sup> /g) | P. D.<br>(nm) | I <sub>D</sub> / I <sub>G</sub> |
|---------|------------------------------|----------------------------|---------------|---------------------------------|
| ND      | 307                          | 0.56                       | 10.6          | 0.76                            |
| ND-900  | 351                          | 0.74                       | 11.4          | 0.87                            |
| ND-1100 | 345                          | 0.78                       | 11.7          | 0.96                            |

Table S2 The comparison of the Ru/ND-900 catalyst and various carbons supported Ru catalysts for hydrogenation of levulinic acid toward GVL

| samples | Conversion of LA | Selectivity of GVL |
|---------|------------------|--------------------|
|---------|------------------|--------------------|

|             | (%)  | (%) |
|-------------|------|-----|
| 1%Ru/ND-900 | 35.1 | >99 |
| 2%Ru/ND-900 | 38.9 | >99 |
| 4%Ru/ND-900 | 34.2 | >99 |
| 2%Ru/AC     | 23.8 | >99 |
| 2%Ru/CB     | 31.5 | >99 |

Reaction condition: LA (1 g), water (10 mL), LA /Ru (mol ratio) = 5000, (molar ratio), 70 °C, 4 MPa H<sub>2</sub>, 1000 rpm, and 1 h.

Table S3 The activation energy of hydrogenation of levulinic acid toward GVL for the Ru/ND-900 catalyst and the various Ru catalysts reported in reference.

| Samples                             | Reaction temperature (°C) | H <sub>2</sub> Pressure (MPa) | Ea (kJ/mol) | Reference |
|-------------------------------------|---------------------------|-------------------------------|-------------|-----------|
| Ru/C                                | 90                        | 0.1                           | 26          | [1]       |
| Ru/C                                | 30                        | 0.1                           | 48          | [1]       |
| Ru@C-Al <sub>2</sub> O <sub>3</sub> | 25                        | 0.1                           | 34          | [2]       |
| Ru/BPhDS                            | 120                       | 4.0                           | 53.3        | [3]       |
| Ru/ND-900                           | 70                        | 4.0                           | 33.1        | This work |

Table S4. The binding energy shift of the Ru0 in the Ru/ND-T.

| Catalysts  | B.E. (eV) | B.E. shift (eV) |
|------------|-----------|-----------------|
| Ru/ND      | 461.3     | -0.6            |
| Ru/ND-700  | 461.1     | -0.8            |
| Ru/ND-900  | 460.8     | -1.1            |
| Ru/ND-1100 | 461.2     | -0.7            |
| Ru/ND-1300 | 461.5     | -0.4            |
| Ru/C*      | 461.9     | none            |

\* The Ru/C catalyst prepared by incipient-wetness impregnation method reported in the literature [Y. Li et al., Catalysis Today 2011, 174, 97 105]

[1] O.A. Abdelrahman, A. Heyden, J.Q. Bond, Analysis of Kinetics and Reaction Pathways in the Aqueous-Phase Hydrogenation of Levulinic Acid to Form  $\gamma$ -Valerolactone over Ru/C, ACS Catalysis, 4 (2014) 1171-1181.

[2] C. Van Nguyen, B.M. Matsagar, J.-Y. Yeh, W.-H. Chiang, K.C.W. Wu, MIL-53-NH<sub>2</sub>-derived carbon-Al<sub>2</sub>O<sub>3</sub> composites supported Ru catalyst for effective hydrogenation of levulinic acid to  $\gamma$ -valerolactone under ambient conditions, Molecular Catalysis, 475 (2019) 110478.

[3] C. Moustani, E. Anagnostopoulou, K. Krommyda, C. Panopoulou, K.G. Koukoulakis, E.B. Bakeas, G. Papadogianakis, Novel aqueous-phase hydrogenation reaction of the key biorefinery platform chemical levulinic acid into  $\gamma$ -valerolactone employing highly active, selective, and stable water-soluble ruthenium catalysts modified with nitrogen-containing ligands, *Applied Catalysis B: Environmental*, 238 (2018) 82-92.
